# Supplementary material for: Measure quantity of mitochondrial DNA in aged bones or calculate it from nuclear DNA quantitative PCR results?
Source: Int J Legal Med. 2023 Aug 10;137(6):1653–9. doi: 10.1007/s00414-023-03074-2 (PMC10567894; doi:10.1007/s00414-023-03074-2)
Supplement: Supplementary file 1 — (XLSX 23 kb) [file 414_2023_3074_MOESM1_ESM.xlsx]

## Sheet: qPCR
SUPPLEMENTARY MATERIAL 1
Comparison of quantitative PCR results for mitochondrial DNA in relation to nuclear DNA isolated from Second World War mass grave skeletal remains
Table 1 SM 1: qPCR results for nDNA [Auto] target (84 bp) (ng / µL) (PowerQuant, Promega), mtDNA [113 bp] target (copies / µL) both shown as average of a duplicate measurement, and IPC shift (PowerQuant, Promega).
Sample name	nDNA (ng / µL)	mtDNA (copies / µL)	IPC Shift
S1	0.2673	210723	-0.08
S2	0.1709	25920	-0.29
S3	0.2067	197949	-0.05
S4	0.0121	208039	-0.38
S5	0.2475	138370	-0.36
S6	0.0025	181073	-0.4
S7	0.1001	191674	0.15
S8	0.2034	127316	-0.35
S9	0.1641	18878	-0.32
S10	0.2589	153420	-0.22
S11	0.0739	116776	-0.16
S12	0.0825	207107	-0.02
S13	0.1852	87069	-0.23
S14	0.2015	375685	-0.26
S15	0.0286	28698	-0.08
S16	0.0133	67719	-0.11
S17	0.0055	63592	-0.21
S18	0.0791	55387	-0.22
S19	0.0027	25429	0.13
S20	0.231	18528	-0.05
S21	0.0046	272577	-0.18
S22	0.0797	35214	0.13
S23	0.1346	202403	-0.18
S24	0.3283	116769	-0.34
S25	0.0138	5686	-0.21
S26	0.1463	109173	-0.23
S27	0.1357	76711	0.04
S28	0.1001	190331	-0.31
S29	0.023	12578	-0.09
S30	0.0126	70921	-0.13
S31	0.1446	77331	-0.11
S32	0.0869	317240	-0.37
S33	0.0427	5547	-0.17
S34	0.0773	59972	-0.25
S35	0.1148	60313	0.21
S36	0.0471	347495	-0.36
S37	0.0917	58175	-0.51
S38	0.0348	76059	-0.37
S39	0.2257	176680	-0.26
S40	0.0315	288184	-0.35
S41	0.1629	97838	-0.12
S42	0.1053	32127	-0.5
S43	0.1271	111812	-0.29
S44	0.02	9953	-0.1
S45	0.1939	60692	-0.24
S46	0.1669	55745	-0.08
S47	0.0612	24553	-0.27
S48	0.0022	58811	-0.48
S49	0.0049	7381	-0.25
S50	0.0057	6616	-0.35
S51	0.2263	69554	-0.22
S52	0.1737	113855	0.53
S53	0.0679	347051	-0.42
S54	0.1007	96844	-0.16
S55	0.0634	62141	0.01
S56	0.0176	5612	-0.22
S57	0.0082	83088	-0.23
S58	0.0854	159666	-0.15
S59	0.0075	312166	-3
S60	0.0096	120123	-0.21
S61	0.0941	20748	-0.13
S62	0.0516	22526	0.01
S63	0.0906	46170	-0.23
S64	0.0097	11595	-0.23
S65	0.004	34040	0.76
S66	0.0044	83124	0.22
S67	0.0054	167767	-0.07
S68	0.0141	374968	-0.56
S69	0.0125	274347	-0.46
S70	0.0026	114299	0.69
S71	0.0064	235552	-0.45
S72	0.0072	73514	0.05
S73	0.0059	110266	-0.46
S74	0.0024	53347	-0.72
S75	0.0113	109882	0.43

## Sheet: mtDNA (qPCR & calculated)
Table 2 SM 1: measured mtDNA copies based on [113 bp] target (copies / µL), calculated mtDNA copies (from PowerQuant nDNA [Auto] target; as stated by manufacturer - 0.1 ng corresponding to 2900 copies), and ratio between the parameters.
Sample name	mtDNA (copies / µL) (quantified [113 bp] fragment)	mtDNA copies (calculated from nDNA PowerQuant [Auto] target quantification results, according to manufacturer's instructions; 0.1 ng = 2900 copies)	Ratio between mtDNA measured [113 bp] fragment and calculated number of mtDNA copies.
S1	210723	7751.7	27.1841
S2	25920	4956.1	5.22992
S3	197949	5994.3	33.0229
S4	208039	350.9	592.873
S5	138370	7177.5	19.2783
S6	181073	72.5	2497.56
S7	191674	2902.9	66.0285
S8	127316	5898.6	21.5841
S9	18878	4758.9	3.96688
S10	153420	7508.1	20.4339
S11	116776	2143.1	54.4893
S12	207107	2392.5	86.5651
S13	87069	5370.8	16.2116
S14	375685	5843.5	64.2911
S15	28698	829.4	34.6009
S16	67719	385.7	175.574
S17	63592	159.5	398.696
S18	55387	2293.9	24.1453
S19	25429	78.3	324.764
S20	18528	6699	2.76579
S21	272577	133.4	2043.31
S22	35214	2311.3	15.2356
S23	202403	3903.4	51.853
S24	116769	9520.7	12.2647
S25	5686	400.2	14.2079
S26	109173	4242.7	25.732
S27	76711	3935.3	19.4931
S28	190331	2902.9	65.5658
S29	12578	667	18.8576
S30	70921	365.4	194.091
S31	77331	4193.4	18.4411
S32	317240	2520.1	125.884
S33	5547	1238.3	4.47953
S34	59972	2241.7	26.7529
S35	60313	3329.2	18.1164
S36	347495	1365.9	254.407
S37	58175	2659.3	21.8761
S38	76059	1009.2	75.3656
S39	176680	6545.3	26.9934
S40	288184	913.5	315.472
S41	97838	4724.1	20.7104
S42	32127	3053.7	10.5207
S43	111812	3685.9	30.3351
S44	9953	580	17.1603
S45	60692	5623.1	10.7933
S46	55745	4840.1	11.5173
S47	24553	1774.8	13.8342
S48	58811	63.8	921.803
S49	7381	142.1	51.9423
S50	6616	165.3	40.0242
S51	69554	6562.7	10.5984
S52	113855	5037.3	22.6024
S53	347051	1969.1	176.249
S54	96844	2920.3	33.1623
S55	62141	1838.6	33.798
S56	5612	510.4	10.9953
S57	83088	237.8	349.403
S58	159666	2476.6	64.4698
S59	312166	217.5	1435.25
S60	120123	278.4	431.476
S61	20748	2728.9	7.60306
S62	22526	1496.4	15.0535
S63	46170	2627.4	17.5725
S64	11595	281.3	41.2193
S65	34040	116	293.448
S66	83124	127.6	651.442
S67	167767	156.6	1071.31
S68	374968	408.9	917.016
S69	274347	362.5	756.819
S70	114299	75.4	1515.9
S71	235552	185.6	1269.14
S72	73514	208.8	352.079
S73	110266	171.1	644.454
S74	53347	69.6	766.48
S75	109882	327.7	335.313

## Sheet: nDNA (qPCR & calculated copies)
Table 3 SM 1: measured nDNA (PowerQuant nDNA [Auto] target), and calculated copies (using 6pg / genome).
Sample name	nDNA (ng / µL)	nDNA (copies / µL) (6 pg / genome) (calculated from nDNA PQ)
S1	0.2673	44.55
S2	0.1709	28.4833
S3	0.2067	34.45
S4	0.0121	2.01667
S5	0.2475	41.25
S6	0.0025	0.416667
S7	0.1001	16.6833
S8	0.2034	33.9
S9	0.1641	27.35
S10	0.2589	43.15
S11	0.0739	12.3167
S12	0.0825	13.75
S13	0.1852	30.8667
S14	0.2015	33.5833
S15	0.0286	4.76667
S16	0.0133	2.21667
S17	0.0055	0.916667
S18	0.0791	13.1833
S19	0.0027	0.45
S20	0.231	38.5
S21	0.0046	0.766667
S22	0.0797	13.2833
S23	0.1346	22.4333
S24	0.3283	54.7167
S25	0.0138	2.3
S26	0.1463	24.3833
S27	0.1357	22.6167
S28	0.1001	16.6833
S29	0.023	3.83333
S30	0.0126	2.1
S31	0.1446	24.1
S32	0.0869	14.4833
S33	0.0427	7.11667
S34	0.0773	12.8833
S35	0.1148	19.1333
S36	0.0471	7.85
S37	0.0917	15.2833
S38	0.0348	5.8
S39	0.2257	37.6167
S40	0.0315	5.25
S41	0.1629	27.15
S42	0.1053	17.55
S43	0.1271	21.1833
S44	0.02	3.33333
S45	0.1939	32.3167
S46	0.1669	27.8167
S47	0.0612	10.2
S48	0.0022	0.366667
S49	0.0049	0.816667
S50	0.0057	0.95
S51	0.2263	37.7167
S52	0.1737	28.95
S53	0.0679	11.3167
S54	0.1007	16.7833
S55	0.0634	10.5667
S56	0.0176	2.93333
S57	0.0082	1.36667
S58	0.0854	14.2333
S59	0.0075	1.25
S60	0.0096	1.6
S61	0.0941	15.6833
S62	0.0516	8.6
S63	0.0906	15.1
S64	0.0097	1.61667
S65	0.004	0.666667
S66	0.0044	0.733333
S67	0.0054	0.9
S68	0.0141	2.35
S69	0.0125	2.08333
S70	0.0026	0.433333
S71	0.0064	1.06667
S72	0.0072	1.2
S73	0.0059	0.983333
S74	0.0024	0.4
S75	0.0113	1.88333
